# Supplementary material
Source: publisher site journal article supplement (https://www.spandidos-publications.com/4925/downloadSupplementary)
Supplement: Supplementary file 1 [file downloadSupplementary]

Table SI. Association between the BUN/Cr ratio and in-hospital mortality in patients with acute myocardial infarction without heart failure in different models.

| Characteristics   | Non-adjusted HR (95% CI) | P-value | Adjusted model I HR (95% CI) | P-value | Adjusted model II HR (95% CI) | P-value |
|-------------------|--------------------------|---------|------------------------------|---------|-------------------------------|---------|
| BUN/Cr            | 1.21 (1.14-1.29)         | <0.0001 | 1.16 (1.08-1.24)             | <0.0001 | 1.13 (1.08-1.28)              | 0.0002  |
| BUN/Cr tertiles   |                          |         |                              |         |                               |         |
| Tertile 1         | Reference                |         | Reference                    |         | Reference                     |         |
| Tertile 2         | 1.25 (0.90-1.74)         | 0.1900  | 1.28 (0.90-1.81)             | 0.1639  | 1.60 (1.00-2.55)              | 0.0497  |
| Tertile 3         | 2.33 (1.73-3.13)         | <0.0001 | 1.98 (1.44-2.73)             | <0.0001 | 2.50 (1.62-3.87)              | <0.0001 |
| P-value for trend |                          | <0.0001 |                              | <0.0001 |                               | <0.0001 |

Models were derived from Cox proportional hazards regression models. Adjusted model I adjusted for: Age, sex and ethnicity. Adjusted model II adjusted for: Age, sex, ethnicity, BMI, heart rate, oxygen saturation, platelets, total protein, acute myocardial infarction category, history of diabetes, history of hypertension, percutaneous coronary intervention, and administration of norepinephrine, dopamine and epinephrine. P-value for trend was obtained from the median value of each BUN/Cr tertile as a continuous variable in the models. BUN, blood urea nitrogen; Cr, creatinine; HR, hazard ratio.
